# Supplementary material for: A Targeted In Vivo RNAi Screen Reveals Deubiquitinases as New Regulators of Notch Signaling
Source: PubMed Central journal article supplement (PMC3516478; doi:10.1534/g3.112.003780), 2012-12-01
Supplement: supp_2.12.1563_003780SI.pdf [file supp_2.12.1563_003780SI.pdf]

Zhang *et al.*, Figure S1

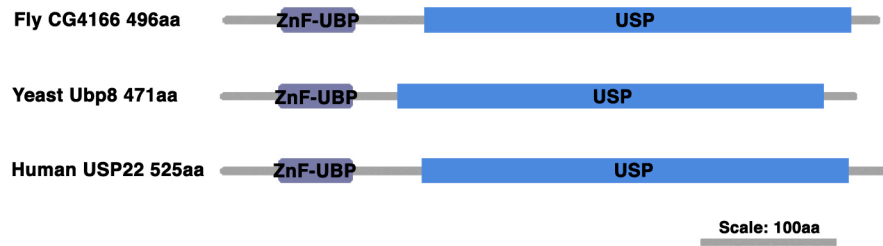

**Figure S1** Domain Architectures of the Fly CG4166 and Its Yeast and Human Orthologs. The fly *CG4166*, yeast *ubp8* and vertebrate *usp22* encode orthologous proteins belonging to the USP sub-family of DUBs. All three proteins contain a unique ZnF-UBP domain (zinc-finger ubiquitin binding domain) located N-terminal to the USP signature DUB domain.

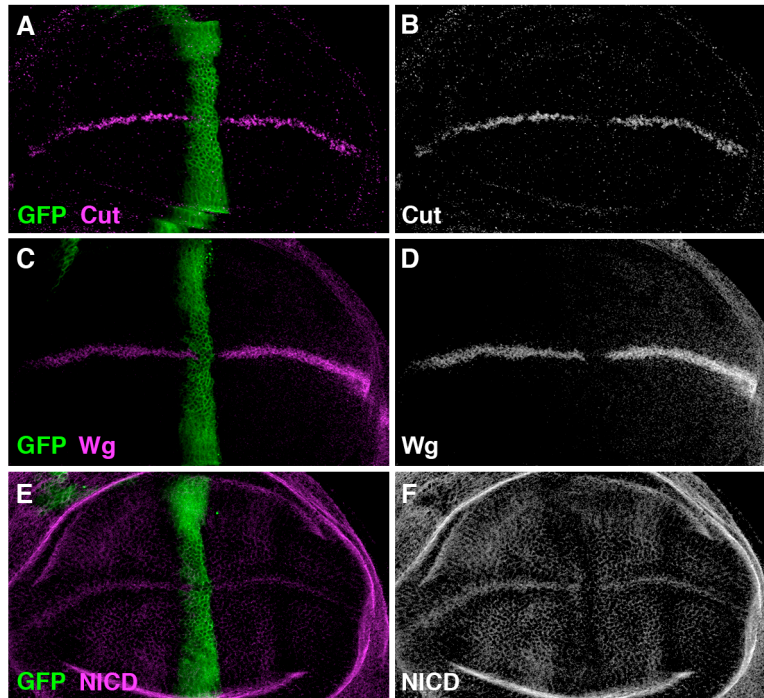

**Figure S2** *CG9124* Positively Regulates Notch Signaling in the Wing Disc. When the expression of *CG9124* was knocked down by RNAi along the anterior-posterior boundary using the *ptc*-Gal4 driver (marked by GFP; A, C and E), the activity of Notch signaling and the abundance of Notch protein were reduced as indicated by decreased expression of Cut (B), Wg (D) and NICD (F). All phenotypes are fully penetrant (n>20 discs).

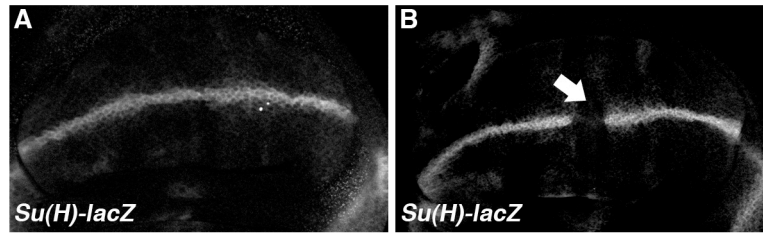

**Figure S3** The Effect of Reduced Expression of *CG32479* on the Activity of the *Su(H)-lacZ* Reporter. The activity of one of the downstream targets of Notch signaling, the *Su(H)-lacZ* reporter, was visualized by a b-Galactosidase antibody along the presumptive wing margin in the wing disc (A). When *CG32479* RNAi was overexpressed using the *ptc-Gal4* driver along the anterior-posterior boundary, the *Su(H)-lacZ* activity was completely abolished in a region of the wing disc where the presumptive wing margin intersects the anterior-posterior boundary (arrow; B). This phenotype is fully penetrant (n=10).

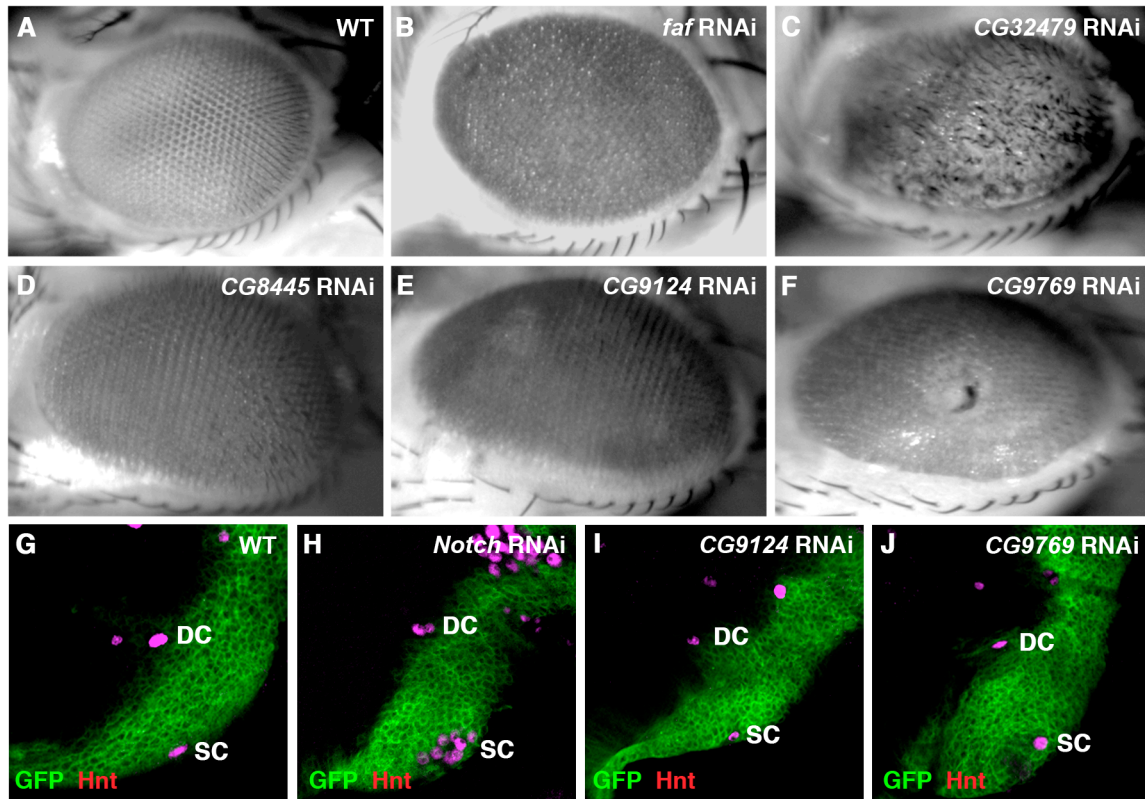

**Figure S4** The Effects of Candidate DUBs on Eye Development and Scutellar Bristle Differentiation. Overexpressing *faf* RNAi by the *tub*-Gal4 (B), *CG32479* (C), *CG8445* (D), *CG9124* (E) or *CG9769* (F) RNAi by the *GMR*-Gal4 led to obvious eye patterning defects, as compared with a wildtype adult eye shown in A. During larval development, Hnt (magenta) serves a marker for scutellar (SC) and dorsal-central (DC) SOPs (G) in the wing disc. Reduced *Notch* expression by RNAi using the *dpp*-Gal4 driver significantly expanded the number of SC SOPs in the wing disc (H). Although overexpressing *CG9124* or *CG9769* RNAi led to pupal lethality, the number of Hnt-positive SC SOPs did not change in the larval wing disc. These results suggested that *CG9124* and *CG9769* may not participate in Notch signaling-mediated specification of scutellar bristles. Note that the expression pattern of the *dpp*-Gal4 driver (marked by GFP; G-J) overlaps the SC but not the DC SOPs. All phenotypes are fully penetrant (n>10).

**Table S1 Vertebrate Orthologs of Annotated *Drosophila* DUBs.** Vertebrate orthologs of the *Drosophila* DUBs were

identified based on the NCBI HomoloGene and OrthoDB databases.

| <b>Ubiquitin C-terminal Hydrolases; IPR001578: Peptidase C12</b> |                      |                     |
|------------------------------------------------------------------|----------------------|---------------------|
| <i>Drosophila melanogaster</i>                                   | Specific DUB Domains | <i>Homo sapiens</i> |
| CG1950                                                           | Peptidase_C12        | UCHL5               |
| CG3431 (Uch-L3)                                                  | Peptidase_C12        | UCHL5               |
| CG4265 (Uch)                                                     | Peptidase_C12        | UCHL3               |
| CG8445 (Calypso)                                                 | Peptidase_C12        | BAP1, UCHL2         |

  

| <b>Ubiquitin-specific Proteases; IPR001394: Peptidase C19</b> |                      |                     |
|---------------------------------------------------------------|----------------------|---------------------|
| <i>Drosophila melanogaster</i>                                | Specific DUB Domains | <i>Homo sapiens</i> |
| CG12082                                                       | Peptidase_C19B       | USP5                |
| CG14619                                                       | Peptidase_C19R       | USP2, USP21         |
| CG1490 (Usp7)                                                 | Peptidase_C19C       | USP7                |
| CG15817                                                       | Peptidase_C19O       | USP1                |
| CG1945 (Faf)                                                  | Peptidase_C19C       | USP9X               |
| CG2904 (Ec)                                                   | Peptidase_C19        | USP54               |
| CG3016                                                        | Peptidase_C19F       | USP30               |
| CG30421                                                       | Peptidase_C19R       | USP31               |
| CG32479                                                       | Peptidase_C19        | USP10               |
| CG4165                                                        | Peptidase_C19K       | USP45               |
| CG4166 (Not)                                                  | Peptidase_C19D       | USP22               |
| CG5384                                                        | Peptidase_C19A       | USP14               |
| CG5486 (Ubp64E)                                               | Peptidase_C19C       | USP47               |
| CG5505 (Scny)                                                 | Peptidase_C19E       | USP36               |
| CG5603 (CLYD)                                                 | Peptidase_C19N       | CYLD                |
| CG5794                                                        | Peptidase_C19C       | USP34               |
| CG5798 (Ubpy)                                                 | Peptidase_C19R       | UBPY/USP8           |
| CG7023                                                        | Peptidase_C19        | USP12, USP46        |
| CG7288                                                        | Peptidase_C19M       | USP39               |
| CG8232                                                        | Peptidase_C19        | PAN2                |
| CG8334                                                        | Peptidase_C19        | USP32               |
| CG8494                                                        | Peptidase_C19R       | USP20, USP33        |
| CG8830                                                        | Peptidase_C19H       | USP35, USP38        |

  

| <b>Machado-Joseph Disease Domain Proteases; IPR006155: Machado-Joseph Disease Protein MJD</b> |                      |                     |
|-----------------------------------------------------------------------------------------------|----------------------|---------------------|
| <i>Drosophila melanogaster</i>                                                                | Specific DUB Domains | <i>Homo sapiens</i> |
| CG3781                                                                                        | Josephin             | JOSD1, JOSD2        |

  

| <b>Otubain Proteases; IPR003323: Ovarian Tumour, Otubain</b> |                      |                     |
|--------------------------------------------------------------|----------------------|---------------------|
| <i>Drosophila melanogaster</i>                               | Specific DUB Domains | <i>Homo sapiens</i> |
| CG12743 (Otu)                                                | OTU                  |                     |
| CG3251                                                       | OTU                  |                     |
| CG4603                                                       | OTU                  | YOD1                |
| CG4968                                                       | OTU                  | OTUB1               |
| CG6091                                                       | OTU                  | OTUD5               |
| CG7857                                                       | OTU                  | OTUD6B              |

**JAMM Domain Proteases; IPR000555: JAB1/Mov34/MPN/PAD-1**

| <i>Drosophila melanogaster</i> | Specific DUB Domains | <i>Homo sapiens</i> |
|--------------------------------|----------------------|---------------------|
| CG14884 (CSN5)                 | MPN_RPN11_CSN5       | COP55               |
| CG18174 (Rpn11)                | MPN_RPN11_CSN5       | PSMD14              |
| CG2224                         | MPN_AMSH_like        | STAMBP              |
| CG3416 (Mov34)                 | MPN_RPN7_8           | PSMD7               |
| CG4751                         | MPN_2A_DUB           | MPND                |
| CG6932 (CSN6)                  | MPN_CSN6             | COPS6               |
| CG8335 (eIF3-S5)               | MPN_eIF3f            | EIF3F               |
| CG8877 (Prp8)                  | MPN_PRP8             | PRPF                |
| CG9124 (eIF-3p40)              | MPN_eIF3h            | EIF3H               |
| CG9769 (eIF3-S5)               | MPN_eIF3f            | EIF3F               |

**Table S2 The Complete Data of the RNAi-based Screen for Novel DUB Regulators of Notch Signaling in *Drosophila*.** Adult wing and scutellar bristle phenotypes were scored when the expression of individual DUBs was knocked down by specific RNAi using the *c96*-Gal4 and *dpp*-Gal4 drivers, respectively.

| <b>Ubiquitin C-Terminal Hydrolases, IPR001578, Peptidase C12, Ubiquitin Carboxyl-terminal Hydrolase 1</b> |                        |                                          |                                             |                         |
|-----------------------------------------------------------------------------------------------------------|------------------------|------------------------------------------|---------------------------------------------|-------------------------|
| <b>CG Number</b>                                                                                          | <b>RNAi Strains</b>    | <b>Wing Phenotypes (<i>c96</i>-Gal4)</b> | <b>Bristle Phenotypes (<i>dpp</i>-Gal4)</b> | <b>Other Phenotypes</b> |
| CG1950                                                                                                    | N1950R-1               | No phenotype                             | No phenotype                                | a                       |
|                                                                                                           | N1950R-2               | No phenotype                             | No phenotype                                | a                       |
| CG4265                                                                                                    | V103614                | No phenotype                             | No phenotype                                | a                       |
|                                                                                                           | N4265R-1               | No phenotype                             | No phenotype                                | a                       |
|                                                                                                           | N4265R-2               | No phenotype                             | No phenotype                                | a                       |
| CG3431                                                                                                    | V103481                | No phenotype                             | Pupal lethal                                | f                       |
|                                                                                                           | N3431R-1               | No phenotype                             | Arrest before 3rd-instar larvae             | b                       |
|                                                                                                           | N3431R-3               | No phenotype                             | Arrest before 3rd-instar larvae             | b                       |
| CG8445 ( <i>calypso</i> )                                                                                 | V107757                | Notched wing                             | More scutellar bristles (SCBs)              | f                       |
|                                                                                                           | N8445R-1               | No phenotype                             | No phenotype <sup>1</sup>                   | b                       |
|                                                                                                           | N8445R-2               | No phenotype                             | No phenotype <sup>1</sup>                   | a                       |
| <b>4 genes</b>                                                                                            | <b>11 RNAi strains</b> |                                          |                                             |                         |
| <b>Ubiquitin-Specific Proteases, IPR001394, Peptidase C19, Ubiquitin Carboxyl-terminal Hydrolase 1</b>    |                        |                                          |                                             |                         |
| <b>CG Number</b>                                                                                          | <b>RNAi Strains</b>    | <b>Wing Phenotypes (<i>c96</i>-Gal4)</b> | <b>Bristle Phenotypes (<i>dpp</i>-Gal4)</b> | <b>Other Phenotypes</b> |
| CG12082                                                                                                   | V17567                 | Loss of margin bristles, wrinkled wing   | Pupal lethal                                | f                       |
|                                                                                                           | N12082R-2              | Loss of margin bristles, wrinkled wing   | Less SCBs                                   | b                       |
| CG14619                                                                                                   | V104382                | No phenotype                             | No phenotype                                | f                       |
|                                                                                                           | N14619R-1              | No phenotype                             | No phenotype                                | b                       |
|                                                                                                           | N14619R-3              | No phenotype                             | No phenotype                                | b                       |
| CG1490 ( <i>Usp-7</i> )                                                                                   | V18231                 | No phenotype                             | Less SCBs                                   | c                       |
|                                                                                                           | V110324                | No phenotype                             | Pupal lethal                                | f                       |
| CG15817                                                                                                   | V41604                 | No phenotype                             | No phenotype                                | a                       |
|                                                                                                           | V100992                | No phenotype                             | No phenotype                                | f                       |

|                 |          |                                        |                                              |   |
|-----------------|----------|----------------------------------------|----------------------------------------------|---|
| CG1945 (faf)    | V107716  | No phenotype                           | No phenotype                                 | f |
|                 | N1945R-1 | No phenotype                           | No phenotype                                 | b |
|                 | N1945R-2 | No phenotype                           | No phenotype                                 | b |
| CG2904 (ec)     | V106671  | No phenotype                           | Pupal lethal                                 | f |
|                 | N2904R-1 | No phenotype                           | No phenotype                                 | a |
|                 | N2904R-2 | No phenotype                           | No phenotype                                 | a |
| CG3016          | V110616  | No phenotype                           | No phenotype                                 | f |
|                 | N3016R-1 | No phenotype                           | No phenotype                                 | b |
|                 | N3016R-2 | No phenotype                           | No phenotype                                 | b |
| CG30421         | V33726   | No phenotype                           | No phenotype                                 | a |
| CG32479         | V37858   | Notched wing, wrinkled wing            | Lethal before 3rd-instar larvae <sup>2</sup> | c |
|                 | V37859   | Notched wing                           | Pupal lethal                                 | c |
| CG4165          | V110286  | No phenotype                           | No phenotype                                 | f |
|                 | N4165R-1 | No phenotype                           | No phenotype                                 | b |
|                 | N4165R-2 | No phenotype                           | No phenotype                                 | b |
| CG4166 (Not)    | V45775   | Loss of margin bristles, wrinkled wing | Lethal before 3rd-instar larvae <sup>2</sup> | c |
|                 | V45776   | Loss of margin bristles, wrinkled wing | Lethal before 3rd-instar larvae <sup>2</sup> | c |
| CG5384          | V27405   | No phenotype                           | No phenotype                                 | c |
| CG5486 (Ubp64E) | V26027   | No phenotype                           | No phenotype                                 | a |
|                 | V103743  | No phenotype                           | No phenotype                                 | f |
|                 | N5486R-3 | No phenotype                           | No phenotype                                 | a |
|                 | N5486R-4 | No phenotype                           | No phenotype                                 | a |
|                 | V11152   | No phenotype                           | No phenotype                                 | a |
| CG5505 (scny)   | V105989  | No phenotype                           | Less SCBs                                    | f |
|                 | V101414  | No phenotype                           | No phenotype                                 | f |
| CG5603 (CYLD)   | N5603R-1 | No phenotype                           | No phenotype                                 | a |
|                 | N5603R-2 | No phenotype                           | No phenotype                                 | a |
|                 | V27517   | No phenotype                           | Pupal lethal <sup>3</sup>                    | c |
| CG5794          | V106192  | No phenotype                           | Pupal lethal <sup>3</sup>                    | f |
| CG5798          | V107623  | Loss of margin bristles, curved wing   | Pupal lethal                                 | e |
| CG7023          | V27799   | No phenotype                           | No phenotype                                 | d |
| CG7288          | V47663   | Notched wing                           | Pupal lethal                                 | c |



|        |          |                         |                                 |   |
|--------|----------|-------------------------|---------------------------------|---|
|        | V110535  | Notched wing            | Lethal before 3rd-instar larvae | f |
|        | N7288R-1 | Notched wing            | Pupal lethal <sup>3</sup>       | b |
|        | N7288R-2 | Loss of margin bristles | Pupal lethal <sup>3</sup>       | b |
| CG8232 | N8232R-3 | No phenotype            | No phenotype                    | b |
| CG8334 | V18981   | No phenotype            | No phenotype                    | a |
| CG8494 | V23934   | No phenotype            | No phenotype                    | a |
|        | V28910   | No phenotype            | No phenotype                    | a |
| CG8830 | V28960   | No phenotype            | No phenotype                    | c |

**23 genes**                      **49 RNAi strains**

**Machado-Joseph Disease Domain Proteases, IPR006155, Machado-Joseph Disease Protein MJD**

| CG Number | RNAi Strains | Wing Phenotypes ( <i>c96-Gal4</i> ) | Bristle Phenotypes ( <i>dpp-Gal4</i> ) | Other Phenotypes |
|-----------|--------------|-------------------------------------|----------------------------------------|------------------|
| CG3781    | V7113        | No phenotype                        | No phenotype                           | a                |
|           | V108379      | No phenotype                        | No phenotype                           | a                |

**1 gene**                      **2 RNAi strains**

**Otubain Proteases, IPR003323, Ovarian Tumour, Otubain**

| CG Number | RNAi Strains | Wing Phenotypes ( <i>c96-Gal4</i> ) | Bristle Phenotypes ( <i>dpp-Gal4</i> ) | Other Phenotypes |
|-----------|--------------|-------------------------------------|----------------------------------------|------------------|
| CG12743   | V108845      | No phenotype                        | No phenotype                           | f                |
|           | N12743R-1    | No phenotype                        | No phenotype                           | b                |
|           | N12743R-3    | No phenotype                        | No phenotype                           | b                |
| CG3251    | V34573       | No phenotype                        | No phenotype                           | a                |
|           | V100532      | No phenotype                        | Less SCBs                              | f                |
| CG4603    | V21894       | No phenotype                        | No phenotype                           | a                |
|           | N4603R-1     | No phenotype                        | No phenotype                           | b                |
|           | N4603R-2     | No phenotype                        | No phenotype                           | a                |
| CG4968    | V21978       | No phenotype                        | No phenotype                           | a                |
| CG6091    | V27558       | No phenotype                        | No phenotype                           | c                |
|           | V27559       | No phenotype                        | No phenotype                           | c                |

|        |          |              |              |   |
|--------|----------|--------------|--------------|---|
|        | V110659  | No phenotype | No phenotype | f |
| CG7857 | V105469  | No phenotype | No phenotype | f |
|        | N7857R-2 | No phenotype | No phenotype | b |
|        | N7857R-3 | No phenotype | No phenotype | b |
| CG9448 | V24030   | No phenotype | No phenotype | a |

**7 genes**                      **16 RNAi strains**

**JAMM Domain Proteases, IPR000555, Mov34/MPN/PAD-1**

| CG Number         | RNAi Strains | Wing Phenotypes ( <i>c96-Gal4</i> )   | Bristle Phenotypes ( <i>dpp-Gal4</i> )       | Other Phenotypes |
|-------------------|--------------|---------------------------------------|----------------------------------------------|------------------|
| CG14884           | N14884R-1    | No phenotype                          | Reduced scutellum size, 2 shafts in 1 socket | b                |
| CG18174 (Rpn11)   | V19272       | Notched wing, loss of margin bristles | Pupal lethal <sup>4</sup>                    | c                |
|                   | V19273       | No phenotype                          | No phenotype                                 | a                |
| CG2224            | V20852       | No phenotype                          | No phenotype                                 | a                |
|                   | V108622      | No phenotype                          | No phenotype                                 | f                |
| CG3416 (Mov34)    | V26183       | Notched wing                          | Pupal lethal                                 | c                |
|                   | V108573      | Notched wing                          | Pupal lethal                                 | f                |
| CG4751            | V26623       | No phenotype                          | No phenotype                                 | a                |
|                   | V45530       | No phenotype                          | No phenotype                                 | a                |
| CG6932 (CSN6)     | V22307       | No phenotype                          | Pupal lethal                                 | c                |
|                   | V105385      | No phenotype                          | Stunted SCBs, 2 shafts in 1 socket           | f                |
| CG8335            | V108169      | No phenotype                          | No phenotype                                 | f                |
|                   | N8335R-1     | No phenotype                          | No phenotype                                 | a                |
|                   | N8335R-7     | No phenotype                          | No phenotype                                 | a                |
| CG8877 (Prp8)     | V18567       | Notched wing                          | Pupal lethal                                 | c                |
|                   | N8877R-2     | Notched wing                          | Pupal lethal <sup>3</sup>                    | b                |
|                   | N8877R-3     | Notched wing                          | Pupal lethal <sup>5</sup>                    | b                |
| CG9124 (eIF-3p40) | V106189      | Loss of margin bristles               | Pupal lethal                                 | f                |
|                   | N9124R-1     | No phenotype                          | No phenotype                                 | b                |
|                   | N9124R-2     | No phenotype                          | Pupal lethal                                 | b                |
| CG9769 (eIF3-S5)  | V101465      | Loss of margin bristles               | Pupal lethal                                 | f                |

**10 genes**                      **21 RNAi strains**

<sup>1</sup> Males have extra sex-combs on all legs

<sup>2</sup> Escapers at a lower temperature with more SCBs

<sup>3</sup> Escapers at a lower temperature with less SCBs

<sup>4</sup> Escapers at a lower temperature with reduced scutellum size, less SCBs

<sup>5</sup> Escapers at a lower temperature with less SCBs, 2 shafts in 1 socket

a. No phenotype when overexpressed by different Gal4 drivers in published screens

b. Lethal (semi-lethal) or altered adult structure when driven by the *Act5C*-Gal4 (From the NIG Database)

c. Lethal (semi-lethal) or altered adult structure when driven by the *pnr*-Gal4 (Mummery-Widmer et al. 2009)

d. Lethal when driven by the *elav*-Gal4 (Neely et al. 2010)

e. Lethal (semi-lethal) or altered adult structure when driven by the *sd*-Gal4 (Mukai et al. 2010)

f. Not tested in other RNAi-based screens (the NIG Database; Cronin et al. 2009; Mummery-Widmer et al. 2009; Pospisilik et al. 2009; Neely et al. 2010a; Neely et al. 2010b; Saj et al. 2010; Neumuller et al, 2011; Valakh et al. 2012)

**Table S3 Effects of Reduced Expression of Candidate DUBs on Notch Signaling Targets.** Altered expression of Notch signaling targets, Cut and Wg, was resulted from the *ptc*-Gal4-driven RNAi-mediated downregulation of candidate DUBs.

| <b>CG Number</b>  | <b>Cut Expression</b> | <b>Wg Expression</b>  |
|-------------------|-----------------------|-----------------------|
| CG3416 (Mov34)    | n/e <sup>1</sup>      | n/e <sup>1</sup>      |
| CG18174 (Rpn11)   | Not obviously changed | Not obviously changed |
| CG8445 (calypso)  | Slightly down         | Slightly down         |
| CG9124 (eIF-3p40) | Down                  | Down                  |
| CG9769 (eIF3-S5)  | Down                  | Down                  |
| CG32479           | Down                  | Down                  |

<sup>1</sup> Not examined due to early lethality
