# Supplementary material for: A Targeted In Vivo RNAi Screen Reveals Deubiquitinases as New Regulators of Notch Signaling
Source: PubMed Central journal article supplement (PMC3516478; doi:10.1534/g3.112.003780), 2012-12-01
Supplement: supp_2.12.1563_FigureS1.pdf [file supp_2.12.1563_FigureS1.pdf]

Zhang *et al.*, Figure S1

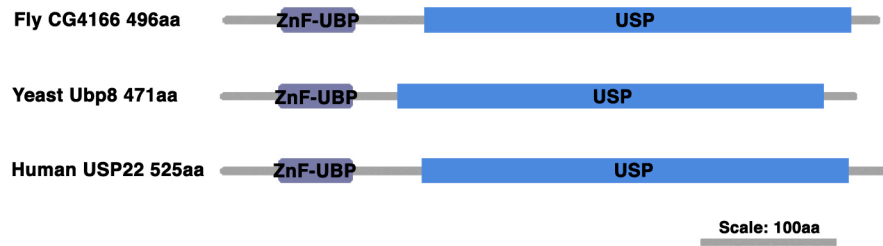

**Figure S1** Domain Architectures of the Fly CG4166 and Its Yeast and Human Orthologs. The fly *CG4166*, yeast *ubp8* and vertebrate *usp22* encode orthologous proteins belonging to the USP sub-family of DUBs. All three proteins contain a unique ZnF-UBP domain (zinc-finger ubiquitin binding domain) located N-terminal to the USP signature DUB domain.
