# Supplementary material for: A Targeted In Vivo RNAi Screen Reveals Deubiquitinases as New Regulators of Notch Signaling
Source: PubMed Central journal article supplement (PMC3516478; doi:10.1534/g3.112.003780), 2012-12-01
Supplement: supp_2.12.1563_TableS1.pdf [file supp_2.12.1563_TableS1.pdf]

**Table S1 Vertebrate Orthologs of Annotated *Drosophila* DUBs.** Vertebrate orthologs of the *Drosophila* DUBs were identified based on the NCBI HomoloGene and OrthoDB databases.

| <b>Ubiquitin C-terminal Hydrolases; IPR001578: Peptidase C12</b> |                      |                     |
|------------------------------------------------------------------|----------------------|---------------------|
| <i>Drosophila melanogaster</i>                                   | Specific DUB Domains | <i>Homo sapiens</i> |
| CG1950                                                           | Peptidase_C12        | UCHL5               |
| CG3431 (Uch-L3)                                                  | Peptidase_C12        | UCHL5               |
| CG4265 (Uch)                                                     | Peptidase_C12        | UCHL3               |
| CG8445 (Calypso)                                                 | Peptidase_C12        | BAP1, UCHL2         |

  

| <b>Ubiquitin-specific Proteases; IPR001394: Peptidase C19</b> |                      |                     |
|---------------------------------------------------------------|----------------------|---------------------|
| <i>Drosophila melanogaster</i>                                | Specific DUB Domains | <i>Homo sapiens</i> |
| CG12082                                                       | Peptidase_C19B       | USP5                |
| CG14619                                                       | Peptidase_C19R       | USP2, USP21         |
| CG1490 (Usp7)                                                 | Peptidase_C19C       | USP7                |
| CG15817                                                       | Peptidase_C19O       | USP1                |
| CG1945 (Faf)                                                  | Peptidase_C19C       | USP9X               |
| CG2904 (Ec)                                                   | Peptidase_C19        | USP54               |
| CG3016                                                        | Peptidase_C19F       | USP30               |
| CG30421                                                       | Peptidase_C19R       | USP31               |
| CG32479                                                       | Peptidase_C19        | USP10               |
| CG4165                                                        | Peptidase_C19K       | USP45               |
| CG4166 (Not)                                                  | Peptidase_C19D       | USP22               |
| CG5384                                                        | Peptidase_C19A       | USP14               |
| CG5486 (Ubp64E)                                               | Peptidase_C19C       | USP47               |
| CG5505 (Scny)                                                 | Peptidase_C19E       | USP36               |
| CG5603 (CLYD)                                                 | Peptidase_C19N       | CYLD                |
| CG5794                                                        | Peptidase_C19C       | USP34               |
| CG5798 (Ubpy)                                                 | Peptidase_C19R       | UBPY/USP8           |
| CG7023                                                        | Peptidase_C19        | USP12, USP46        |
| CG7288                                                        | Peptidase_C19M       | USP39               |
| CG8232                                                        | Peptidase_C19        | PAN2                |
| CG8334                                                        | Peptidase_C19        | USP32               |
| CG8494                                                        | Peptidase_C19R       | USP20, USP33        |
| CG8830                                                        | Peptidase_C19H       | USP35, USP38        |

  

| <b>Machado-Joseph Disease Domain Proteases; IPR006155: Machado-Joseph Disease Protein MJD</b> |                      |                     |
|-----------------------------------------------------------------------------------------------|----------------------|---------------------|
| <i>Drosophila melanogaster</i>                                                                | Specific DUB Domains | <i>Homo sapiens</i> |
| CG3781                                                                                        | Josephin             | JOSD1, JOSD2        |

  

| <b>Otubain Proteases; IPR003323: Ovarian Tumour, Otubain</b> |                      |                     |
|--------------------------------------------------------------|----------------------|---------------------|
| <i>Drosophila melanogaster</i>                               | Specific DUB Domains | <i>Homo sapiens</i> |
| CG12743 (Otu)                                                | OTU                  |                     |
| CG3251                                                       | OTU                  |                     |
| CG4603                                                       | OTU                  | YOD1                |
| CG4968                                                       | OTU                  | OTUB1               |
| CG6091                                                       | OTU                  | OTUD5               |
| CG7857                                                       | OTU                  | OTUD6B              |

**JAMM Domain Proteases; IPR000555: JAB1/Mov34/MPN/PAD-1**

| <i>Drosophila melanogaster</i> | Specific DUB Domains | <i>Homo sapiens</i> |
|--------------------------------|----------------------|---------------------|
| CG14884 (CSN5)                 | MPN_RPN11_CSN5       | COP55               |
| CG18174 (Rpn11)                | MPN_RPN11_CSN5       | PSMD14              |
| CG2224                         | MPN_AMSH_like        | STAMBP              |
| CG3416 (Mov34)                 | MPN_RPN7_8           | PSMD7               |
| CG4751                         | MPN_2A_DUB           | MPND                |
| CG6932 (CSN6)                  | MPN_CSN6             | COPS6               |
| CG8335 (eIF3-S5)               | MPN_eIF3f            | EIF3F               |
| CG8877 (Prp8)                  | MPN_PRP8             | PRPF                |
| CG9124 (eIF-3p40)              | MPN_eIF3h            | EIF3H               |
| CG9769 (eIF3-S5)               | MPN_eIF3f            | EIF3F               |
