# Supplementary material for: A Targeted In Vivo RNAi Screen Reveals Deubiquitinases as New Regulators of Notch Signaling
Source: PubMed Central journal article supplement (PMC3516478; doi:10.1534/g3.112.003780), 2012-12-01
Supplement: supp_2.12.1563_TableS2.pdf [file supp_2.12.1563_TableS2.pdf]

**Table S2 The Complete Data of the RNAi-based Screen for Novel DUB Regulators of Notch Signaling in *Drosophila*.** Adult wing and scutellar bristle phenotypes were scored when the expression of individual DUBs was knocked down by specific RNAi using the *c96*-Gal4 and *dpp*-Gal4 drivers, respectively.

| <b>Ubiquitin C-Terminal Hydrolases, IPR001578, Peptidase C12, Ubiquitin Carboxyl-terminal Hydrolase 1</b> |                        |                                          |                                             |                         |
|-----------------------------------------------------------------------------------------------------------|------------------------|------------------------------------------|---------------------------------------------|-------------------------|
| <b>CG Number</b>                                                                                          | <b>RNAi Strains</b>    | <b>Wing Phenotypes (<i>c96</i>-Gal4)</b> | <b>Bristle Phenotypes (<i>dpp</i>-Gal4)</b> | <b>Other Phenotypes</b> |
| CG1950                                                                                                    | N1950R-1               | No phenotype                             | No phenotype                                | a                       |
|                                                                                                           | N1950R-2               | No phenotype                             | No phenotype                                | a                       |
| CG4265                                                                                                    | V103614                | No phenotype                             | No phenotype                                | a                       |
|                                                                                                           | N4265R-1               | No phenotype                             | No phenotype                                | a                       |
|                                                                                                           | N4265R-2               | No phenotype                             | No phenotype                                | a                       |
| CG3431                                                                                                    | V103481                | No phenotype                             | Pupal lethal                                | f                       |
|                                                                                                           | N3431R-1               | No phenotype                             | Arrest before 3rd-instar larvae             | b                       |
|                                                                                                           | N3431R-3               | No phenotype                             | Arrest before 3rd-instar larvae             | b                       |
| CG8445 ( <i>calypso</i> )                                                                                 | V107757                | Notched wing                             | More scutellar bristles (SCBs)              | f                       |
|                                                                                                           | N8445R-1               | No phenotype                             | No phenotype <sup>1</sup>                   | b                       |
|                                                                                                           | N8445R-2               | No phenotype                             | No phenotype <sup>1</sup>                   | a                       |
| <b>4 genes</b>                                                                                            | <b>11 RNAi strains</b> |                                          |                                             |                         |
| <b>Ubiquitin-Specific Proteases, IPR001394, Peptidase C19, Ubiquitin Carboxyl-terminal Hydrolase 1</b>    |                        |                                          |                                             |                         |
| <b>CG Number</b>                                                                                          | <b>RNAi Strains</b>    | <b>Wing Phenotypes (<i>c96</i>-Gal4)</b> | <b>Bristle Phenotypes (<i>dpp</i>-Gal4)</b> | <b>Other Phenotypes</b> |
| CG12082                                                                                                   | V17567                 | Loss of margin bristles, wrinkled wing   | Pupal lethal                                | f                       |
|                                                                                                           | N12082R-2              | Loss of margin bristles, wrinkled wing   | Less SCBs                                   | b                       |
| CG14619                                                                                                   | V104382                | No phenotype                             | No phenotype                                | f                       |
|                                                                                                           | N14619R-1              | No phenotype                             | No phenotype                                | b                       |
|                                                                                                           | N14619R-3              | No phenotype                             | No phenotype                                | b                       |
| CG1490 ( <i>Usp-7</i> )                                                                                   | V18231                 | No phenotype                             | Less SCBs                                   | c                       |
|                                                                                                           | V110324                | No phenotype                             | Pupal lethal                                | f                       |
| CG15817                                                                                                   | V41604                 | No phenotype                             | No phenotype                                | a                       |
|                                                                                                           | V100992                | No phenotype                             | No phenotype                                | f                       |

|                 |          |                                        |                                              |   |
|-----------------|----------|----------------------------------------|----------------------------------------------|---|
| CG1945 (faf)    | V107716  | No phenotype                           | No phenotype                                 | f |
|                 | N1945R-1 | No phenotype                           | No phenotype                                 | b |
|                 | N1945R-2 | No phenotype                           | No phenotype                                 | b |
| CG2904 (ec)     | V106671  | No phenotype                           | Pupal lethal                                 | f |
|                 | N2904R-1 | No phenotype                           | No phenotype                                 | a |
|                 | N2904R-2 | No phenotype                           | No phenotype                                 | a |
| CG3016          | V110616  | No phenotype                           | No phenotype                                 | f |
|                 | N3016R-1 | No phenotype                           | No phenotype                                 | b |
|                 | N3016R-2 | No phenotype                           | No phenotype                                 | b |
| CG30421         | V33726   | No phenotype                           | No phenotype                                 | a |
| CG32479         | V37858   | Notched wing, wrinkled wing            | Lethal before 3rd-instar larvae <sup>2</sup> | c |
|                 | V37859   | Notched wing                           | Pupal lethal                                 | c |
| CG4165          | V110286  | No phenotype                           | No phenotype                                 | f |
|                 | N4165R-1 | No phenotype                           | No phenotype                                 | b |
|                 | N4165R-2 | No phenotype                           | No phenotype                                 | b |
| CG4166 (Not)    | V45775   | Loss of margin bristles, wrinkled wing | Lethal before 3rd-instar larvae <sup>2</sup> | c |
|                 | V45776   | Loss of margin bristles, wrinkled wing | Lethal before 3rd-instar larvae <sup>2</sup> | c |
| CG5384          | V27405   | No phenotype                           | No phenotype                                 | c |
| CG5486 (Ubp64E) | V26027   | No phenotype                           | No phenotype                                 | a |
|                 | V103743  | No phenotype                           | No phenotype                                 | f |
|                 | N5486R-3 | No phenotype                           | No phenotype                                 | a |
|                 | N5486R-4 | No phenotype                           | No phenotype                                 | a |
|                 | V11152   | No phenotype                           | No phenotype                                 | a |
| CG5505 (scny)   | V105989  | No phenotype                           | Less SCBs                                    | f |
|                 | V101414  | No phenotype                           | No phenotype                                 | f |
| CG5603 (CYLD)   | N5603R-1 | No phenotype                           | No phenotype                                 | a |
|                 | N5603R-2 | No phenotype                           | No phenotype                                 | a |
|                 | V27517   | No phenotype                           | Pupal lethal <sup>3</sup>                    | c |
| CG5794          | V106192  | No phenotype                           | Pupal lethal <sup>3</sup>                    | f |
|                 | V107623  | Loss of margin bristles, curved wing   | Pupal lethal                                 | e |
| CG7023          | V27799   | No phenotype                           | No phenotype                                 | d |
| CG7288          | V47663   | Notched wing                           | Pupal lethal                                 | c |

|        |          |                         |                                 |   |
|--------|----------|-------------------------|---------------------------------|---|
|        | V110535  | Notched wing            | Lethal before 3rd-instar larvae | f |
|        | N7288R-1 | Notched wing            | Pupal lethal <sup>3</sup>       | b |
|        | N7288R-2 | Loss of margin bristles | Pupal lethal <sup>3</sup>       | b |
| CG8232 | N8232R-3 | No phenotype            | No phenotype                    | b |
| CG8334 | V18981   | No phenotype            | No phenotype                    | a |
| CG8494 | V23934   | No phenotype            | No phenotype                    | a |
|        | V28910   | No phenotype            | No phenotype                    | a |
| CG8830 | V28960   | No phenotype            | No phenotype                    | c |

**23 genes**                      **49 RNAi strains**

**Machado-Joseph Disease Domain Proteases, IPR006155, Machado-Joseph Disease Protein MJD**

| CG Number | RNAi Strains | Wing Phenotypes ( <i>c96-Gal4</i> ) | Bristle Phenotypes ( <i>dpp-Gal4</i> ) | Other Phenotypes |
|-----------|--------------|-------------------------------------|----------------------------------------|------------------|
| CG3781    | V7113        | No phenotype                        | No phenotype                           | a                |
|           | V108379      | No phenotype                        | No phenotype                           | a                |

**1 gene**                      **2 RNAi strains**

**Otubain Proteases, IPR003323, Ovarian Tumour, Otubain**

| CG Number | RNAi Strains | Wing Phenotypes ( <i>c96-Gal4</i> ) | Bristle Phenotypes ( <i>dpp-Gal4</i> ) | Other Phenotypes |
|-----------|--------------|-------------------------------------|----------------------------------------|------------------|
| CG12743   | V108845      | No phenotype                        | No phenotype                           | f                |
|           | N12743R-1    | No phenotype                        | No phenotype                           | b                |
|           | N12743R-3    | No phenotype                        | No phenotype                           | b                |
| CG3251    | V34573       | No phenotype                        | No phenotype                           | a                |
|           | V100532      | No phenotype                        | Less SCBs                              | f                |
| CG4603    | V21894       | No phenotype                        | No phenotype                           | a                |
|           | N4603R-1     | No phenotype                        | No phenotype                           | b                |
|           | N4603R-2     | No phenotype                        | No phenotype                           | a                |
| CG4968    | V21978       | No phenotype                        | No phenotype                           | a                |
| CG6091    | V27558       | No phenotype                        | No phenotype                           | c                |
|           | V27559       | No phenotype                        | No phenotype                           | c                |

|        |          |              |              |   |
|--------|----------|--------------|--------------|---|
|        | V110659  | No phenotype | No phenotype | f |
| CG7857 | V105469  | No phenotype | No phenotype | f |
|        | N7857R-2 | No phenotype | No phenotype | b |
|        | N7857R-3 | No phenotype | No phenotype | b |
| CG9448 | V24030   | No phenotype | No phenotype | a |

**7 genes**                      **16 RNAi strains**

**JAMM Domain Proteases, IPR000555, Mov34/MPN/PAD-1**

| CG Number         | RNAi Strains | Wing Phenotypes ( <i>c96-Gal4</i> )   | Bristle Phenotypes ( <i>dpp-Gal4</i> )       | Other Phenotypes |
|-------------------|--------------|---------------------------------------|----------------------------------------------|------------------|
| CG14884           | N14884R-1    | No phenotype                          | Reduced scutellum size, 2 shafts in 1 socket | b                |
| CG18174 (Rpn11)   | V19272       | Notched wing, loss of margin bristles | Pupal lethal <sup>4</sup>                    | c                |
|                   | V19273       | No phenotype                          | No phenotype                                 | a                |
| CG2224            | V20852       | No phenotype                          | No phenotype                                 | a                |
|                   | V108622      | No phenotype                          | No phenotype                                 | f                |
| CG3416 (Mov34)    | V26183       | Notched wing                          | Pupal lethal                                 | c                |
|                   | V108573      | Notched wing                          | Pupal lethal                                 | f                |
| CG4751            | V26623       | No phenotype                          | No phenotype                                 | a                |
|                   | V45530       | No phenotype                          | No phenotype                                 | a                |
| CG6932 (CSN6)     | V22307       | No phenotype                          | Pupal lethal                                 | c                |
|                   | V105385      | No phenotype                          | Stunted SCBs, 2 shafts in 1 socket           | f                |
| CG8335            | V108169      | No phenotype                          | No phenotype                                 | f                |
|                   | N8335R-1     | No phenotype                          | No phenotype                                 | a                |
|                   | N8335R-7     | No phenotype                          | No phenotype                                 | a                |
| CG8877 (Prp8)     | V18567       | Notched wing                          | Pupal lethal                                 | c                |
|                   | N8877R-2     | Notched wing                          | Pupal lethal <sup>3</sup>                    | b                |
|                   | N8877R-3     | Notched wing                          | Pupal lethal <sup>5</sup>                    | b                |
| CG9124 (eIF-3p40) | V106189      | Loss of margin bristles               | Pupal lethal                                 | f                |
|                   | N9124R-1     | No phenotype                          | No phenotype                                 | b                |
|                   | N9124R-2     | No phenotype                          | Pupal lethal                                 | b                |
| CG9769 (eIF3-S5)  | V101465      | Loss of margin bristles               | Pupal lethal                                 | f                |

**10 genes**                      **21 RNAi strains**

<sup>1</sup> Males have extra sex-combs on all legs

<sup>2</sup> Escapers at a lower temperature with more SCBs

<sup>3</sup> Escapers at a lower temperature with less SCBs

<sup>4</sup> Escapers at a lower temperature with reduced scutellum size, less SCBs

<sup>5</sup> Escapers at a lower temperature with less SCBs, 2 shafts in 1 socket

a. No phenotype when overexpressed by different Gal4 drivers in published screens

b. Lethal (semi-lethal) or altered adult structure when driven by the *Act5C*-Gal4 (From the NIG Database)

c. Lethal (semi-lethal) or altered adult structure when driven by the *pnr*-Gal4 (Mummery-Widmer et al. 2009)

d. Lethal when driven by the *elav*-Gal4 (Neely et al. 2010)

e. Lethal (semi-lethal) or altered adult structure when driven by the *sd*-Gal4 (Mukai et al. 2010)

f. Not tested in other RNAi-based screens (the NIG Database; Cronin et al. 2009; Mummery-Widmer et al. 2009; Pospisilik et al. 2009; Neely et al. 2010a; Neely et al. 2010b; Saj et al. 2010; Neumuller et al, 2011; Valakh et al. 2012)
