# Supplementary material for: A Targeted In Vivo RNAi Screen Reveals Deubiquitinases as New Regulators of Notch Signaling
Source: PubMed Central journal article supplement (PMC3516478; doi:10.1534/g3.112.003780), 2012-12-01
Supplement: supp_2.12.1563_TableS3.pdf [file supp_2.12.1563_TableS3.pdf]

**Table S3 Effects of Reduced Expression of Candidate DUBs on Notch Signaling Targets.** Altered expression of Notch signaling targets, Cut and Wg, was resulted from the *ptc*-Gal4-driven RNAi-mediated downregulation of candidate DUBs.

| <b>CG Number</b>  | <b>Cut Expression</b> | <b>Wg Expression</b>  |
|-------------------|-----------------------|-----------------------|
| CG3416 (Mov34)    | n/e <sup>1</sup>      | n/e <sup>1</sup>      |
| CG18174 (Rpn11)   | Not obviously changed | Not obviously changed |
| CG8445 (calypso)  | Slightly down         | Slightly down         |
| CG9124 (eIF-3p40) | Down                  | Down                  |
| CG9769 (eIF3-S5)  | Down                  | Down                  |
| CG32479           | Down                  | Down                  |

<sup>1</sup> Not examined due to early lethality
